# Supplementary material for: Overcoming the Bandwidth Bottleneck in Edge Data Centers via Adaptive On-Chip Optical Equalization
Source: Research Square preprint supplement (doi:10.21203/rs.3.rs-7780910/v1), 2026-02-02
Supplement: Supplementary file 1 [file b653091ee2a80aad1aecf835.docx]

Supporting Information

**Overcoming the Bandwidth Bottleneck in Edge Data Centers via Adaptive On-Chip Optical Equalization**

Yuanjian Wan 1, 2, 3+, Guofeng Yan1, 2, 3+, Bing Han1, 2, 3 and Jian Wang1, 2, 3*

1Wuhan National Laboratory for Optoelectronics and School of Optical and Electronic Information, Huazhong University of Science and Technology, Wuhan 430074, Hubei, China

2Hubei Optical Fundamental Research Center, Wuhan 430074, China

3Optics Valley Laboratory, Wuhan 430074, Hubei, China

+These authors contributed equally: Yuanjian Wan and Guofeng Yan.

*Corresponding author: jwang@hust.edu.cn

**Note 1. Optical FIR Equalizer: Theoretical Transfer Function Analysis**

In this section, we present the detailed derivation of the proposed optical FIR equalizer. As outlined in the main manuscript, the device is implemented by cascading multiple Mach–Zehnder interferometer (MZI) units with tunable phase shifters and delay lines. Each MZI functions as a single optical tap, providing independent control over amplitude and phase. The goal of this equalizer is to realize pre-detection spectral shaping of the optical field, thereby compensating for frequency roll-off and inter-symbol interference (ISI) in bandwidth-limited IM/DD links.


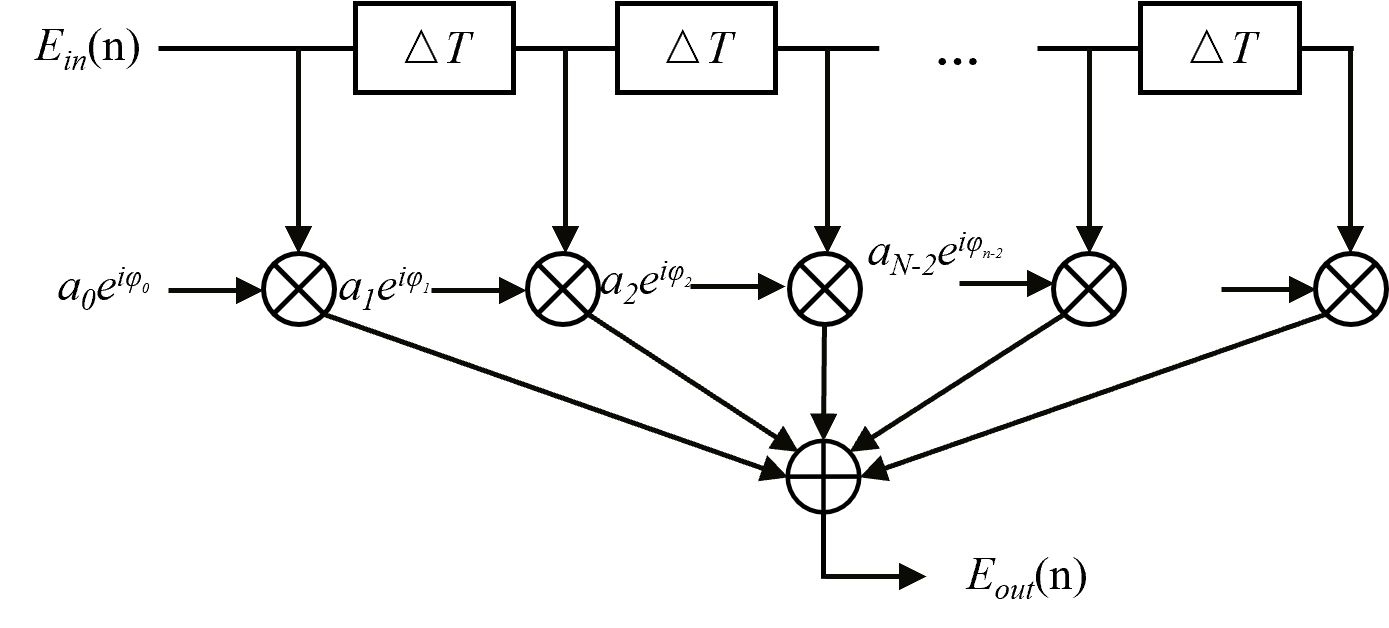


**Fig. S1. Optical FIR filter schematic diagram.**

In the electrical domain, a FIR filter performs weighted accumulation over discrete received samples, where each tap corresponds to a historical sample at a different time instant. In the optical implementation, this form of “temporal memory” is realized by optical delay lines: the same optical signal is replicated and subjected to different time delays, generating a set of “time-expanded” signal replicas. Specifically, the input optical signal is processed through multiple delayed paths to produce a series of temporally shifted components. Each component is then complex-weighted by tap coefficients with controllable amplitude and phase, and finally coherently recombined in an optical coupler to yield the equalized output signal. This process can essentially be regarded as a “convolution operation in the analog domain,” which is mathematically equivalent to the function of FIR filters in the electrical domain, as illustrated in Supplementary Fig. S1.

Formally, the optical FIR equalizer can be expressed as:

, (S1)

where and are the input and output optical fields, respectively, and represent the amplitude and phase weights of the *k*-th tap, is the unit time delay introduced by each optical delay line, and *N* denotes the total number of taps.

By applying the Fourier transform to Eq. (S1), the convolution in the time domain becomes a multiplication in the frequency domain. The frequency response of the optical FIR equalizer is therefore obtained as:

. (S2)

Equation (S2) clearly shows that the equalizer behaves as a linear FIR filter in the optical domain. The coefficientsandact as programmable complex tap weights, the delay spacingdefines the free spectral range (FSR) and determines the resolution of spectral shaping, andis the angular frequency of the input signal. By properly tuning the tap weights, the equalizer can flatten link roll-off, mitigate high-frequency distortions, and provide phase correction prior to photodetection.

As illustrated in Fig. S2, the basic structure of a single-tap optical equalizer is composed of four 3-dB couplers, three phase shifters, and one delay line. The input optical signal first passes through a MZI, which is formed by the first and second 3-dB couplers and the first phase shifter. By tuning, the splitting ratio of the optical field into different paths can be precisely controlled. One portion of the light propagates through the delayed arm with a fixed delay TTT, while the other portion passes through a second phase shifter, which introduces a controllable phase offset between the two arms. The recombination of these two paths is achieved by another MZI, consisting of the third and fourth 3-dB couplers together with the third phase shifter (). This recombination process generates the desired amplitude and phase weighting, thereby completing the function of a single optical FIR tap.


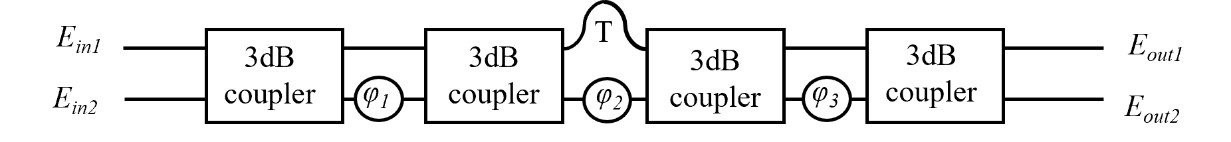


**Fig. S2. Schematic structure of a two-tap optical FIR equalizer.**

To accurately model the transmission response of the optical tap, we adopt the transfer matrix method. The transfer matrices of the elementary building blocks are given as follows:

3-dB coupler:

, (S3)

Phase shifter:

, (S4)

Delay line with phase shifter:

, (S5)

where *𝜔* is the optical angular frequency and 𝑇 is the fixed delay introduced by the delay line. According to the structure shown in Fig. S2, the transfer matrix of the optical tap can be obtained by cascading the matrices of the couplers, phase shifters, and delay line in the order of propagation：

. (S6)

For a single-channel input, the two output ports of the tap can be derived as:

. (S7)

In practical equalizer configurations, one output port is typically selected to feed into the next stage or the system module.

Consequently, the frequency-domain transfer function of the tap is expressed as:

. (S8)

By inverse Fourier transform, the time-domain impulse response of the tap is given by:：

. (S9)

This clearly corresponds to the simplest two-tap FIR filter, in which the real part of the coefficient is jointly determined byand, while the imaginary part is tuned by. The time-domain structure highlights the essence of optical equalization: by introducing delayed replicas of the original signal and coherently combining them with programmable weights, the equalizer compensates for inter-symbol interference from previous symbols, thereby improving transmission performance under bandwidth-limited conditions.

**Note 2. Additional WDM Transmission Results**

To further verify the performance of the proposed optical equalizer in a wavelength-division multiplexed (WDM) scenario, we carried out additional back-to-back (BTB) and equalized transmission experiments at two representative O-band channels, namely 1290 nm and 1291.17 nm. The bit-error-rate (BER) results as a function of received optical power are summarized in Supplementary Fig. S3, with the hard-decision forward error correction (HD-FEC) thresholds for 7% and 20% overhead indicated for reference.

As shown in the BER curves, the BTB system without equalization exhibits pronounced performance degradation at lower received powers, with multiple data points falling above the 20% HD-FEC threshold. In contrast, when the optical equalizer is enabled, both channels achieve BERs consistently below the 7% HD-FEC limit across the entire tested power range. On average, the equalizer delivers a receiver sensitivity improvement of approximately 3–4 dB, clearly demonstrating its ability to mitigate bandwidth-induced distortions.

The corresponding eye diagrams in Supplementary Fig. S3(b–e) further illustrate this enhancement. At both 1290 nm and 1291.17 nm, the un-equalized signals suffer from nearly closed eyes due to severe inter-symbol interference, whereas the equalizer restores wide eye openings with balanced symbol levels and sharp transitions.

Combined with the main-manuscript results at 1290 nm and 1293.82 nm, these findings confirm that the proposed polarization-insensitive optical equalizer not only restores signal quality in single-channel O-band IM/DD links, but also provides broadband multi-wavelength compensation under a shared configuration. This unique capability reduces wavelength-specific tuning overhead, lowers power consumption, and enhances system scalability, making the approach highly attractive for high-capacity and energy-constrained edge interconnects.


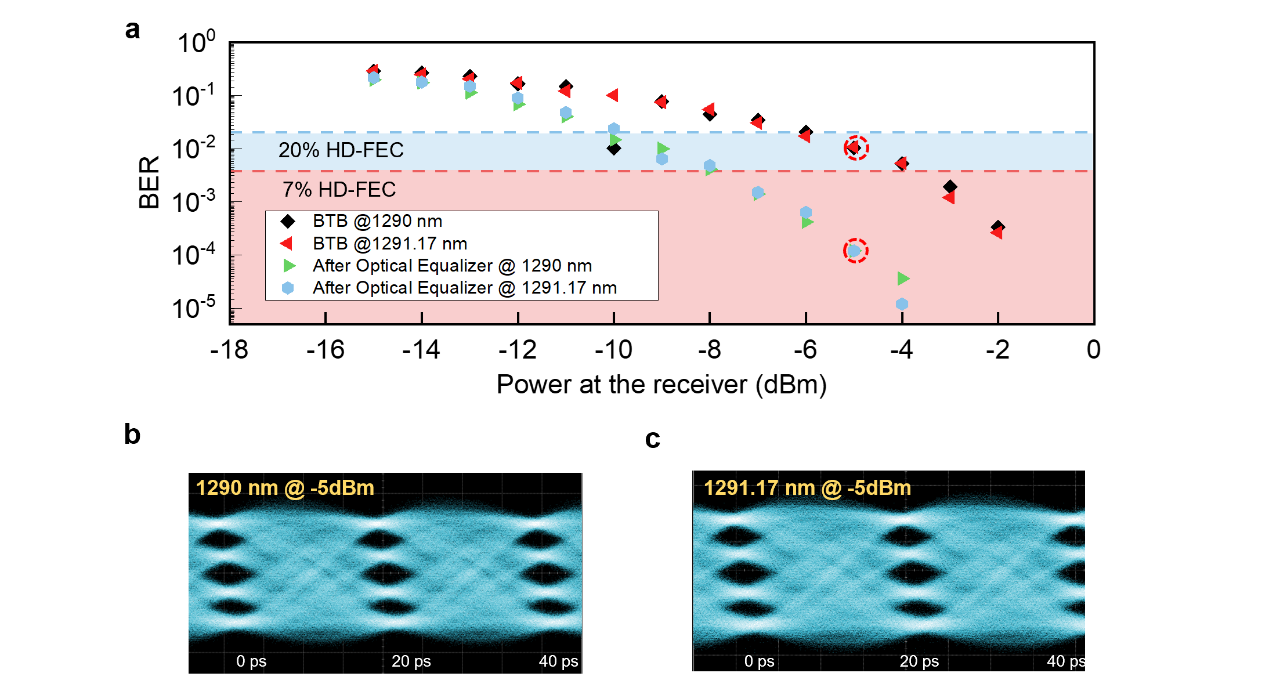


**Fig. S3. Dual-wavelength WDM experiment at 1290 nm and 1291.17 nm.** (a) BER comparison of two WDM channels (1290 nm and 1291.17 nm) with and without optical equalization. (b)–(c), Eye diagrams of the trained wavelength (1290 nm) and untrained wavelength (1291.17 nm) after equalization at −5 dBm received power.
